# Supplementary material for: Implementation of Isavuconazole in a Fluorescence-Based High-Performance Liquid Chromatography Kit Allowing Simultaneous Detection of All Four Currently Licensed Mold-Active Triazoles
Source: PubMed Central journal article supplement (PMC5425791; doi:10.1128/msphere.00098-17), 2017-05-10
Supplement: sph003172283st1.pdf [file sph003172283st1.pdf]

| <b>Sample concentration<br/>(mg/L) (Serum)</b> | <b>Concentration found<br/>(mean mg/L ± S.D.)</b> | <b>Accuracy<sup>1</sup><br/>(%)</b> | <b>Precision<sup>2</sup><br/>(% R.S.D.)</b> |
|------------------------------------------------|---------------------------------------------------|-------------------------------------|---------------------------------------------|
| Person A                                       |                                                   |                                     |                                             |
| LQC (0.3, n=5)                                 | 0.305±0.029                                       | 101.6                               | 9.53                                        |
| HQC (20.0, n=5)                                | 21.037±0.368                                      | 105.2                               | 1.07                                        |
| Person B                                       |                                                   |                                     |                                             |
| LQC (0.3, n=5)                                 | 0.285±0.005                                       | 95.0                                | 1.92                                        |
| HQC (20.0, n=5)                                | 21.277±1.071                                      | 106.4                               | 5.09                                        |
| Person C                                       |                                                   |                                     |                                             |
| LQC (0.3, n=5)                                 | 0.275±0.014                                       | 91.6                                | 5.14                                        |
| HQC (20.0, n=5)                                | 20.959±1.191                                      | 104.8                               | 5.68                                        |
| Person D                                       |                                                   |                                     |                                             |
| LQC (0.3, n=5)                                 | 0.270±0.007                                       | 90.0                                | 2.44                                        |
| HQC (20.0, n=5)                                | 21.988±0.869                                      | 109.9                               | 3.95                                        |
| Person E                                       |                                                   |                                     |                                             |
| LQC (0.3, n=5)                                 | 0.290±0.011                                       | 96.8                                | 3.72                                        |
| HQC (20.0, n=5)                                | 22.074±1.129                                      | 111.0                               | 5.09                                        |
| Person F                                       |                                                   |                                     |                                             |
| LQC (0.3, n=5)                                 | 0.267±0.004                                       | 89.1                                | 1.40                                        |
| HQC (20.0, n=5)                                | 22.453±0.216                                      | 112.3                               | 0.96                                        |

<sup>1</sup>Accuracy is percent of the nominal value.

<sup>2</sup>Precision is expressed as % relative standard deviation (R.S.D.) of each calculated concentration.
